# Supplementary material for: Identification of an IL-4-Related Gene Risk Signature for Malignancy, Prognosis and Immune Phenotype Prediction in Glioma
Source: MDPI journal article supplement (doi:10.3390/brainsci12020181), 2022-01-29
Supplement: s1 [file s1]

Table S2: Clinicopathological features of two gene-risk groups in CGGA and TCGA dataset.

| Features        | Training set CGGA RNA-seq cohort (n=325) |               |                | Validation set TCGA RNA-seq cohort (n=667) |               |                |
|-----------------|------------------------------------------|---------------|----------------|--------------------------------------------|---------------|----------------|
|                 | High-risk                                | Low-risk      | <i>P</i> value | High-risk                                  | Low-risk      | <i>P</i> value |
|                 | group (n=162)                            | group (n=163) |                | group (n=333)                              | group (n=334) |                |
| Age             |                                          |               | <0.001         |                                            |               | <0.001         |
| Median          | 46.5                                     | 39            |                | 54                                         | 39            |                |
| Gender          |                                          |               | 0.148          |                                            |               | 0.734          |
| Female          | 54                                       | 68            |                | 136                                        | 146           |                |
| Male            | 108                                      | 95            |                | 191                                        | 192           |                |
| TCGA subtype    |                                          |               | <0.001         |                                            |               | <0.001         |
| Classical       | 60                                       | 14            |                | 85                                         | 1             |                |
| Mesenchymal     | 68                                       | 0             |                | 97                                         | 0             |                |
| Neural          | 9                                        | 72            |                | 31                                         | 79            |                |
| Proneural       | 25                                       | 77            |                | 55                                         | 182           |                |
| WHO Tumor grade |                                          |               | 0.002          |                                            |               | <0.001         |
| II              | 13                                       | 96            |                | 42                                         | 206           |                |
| III             | 34                                       | 38            |                | 131                                        | 131           |                |
| IV              | 115                                      | 29            |                | 155                                        | 1             |                |
| IDH status      |                                          |               | <0.001         |                                            |               | <0.001         |
| Mutation        | 35                                       | 132           |                | 98                                         | 327           |                |
| Wildtype        | 127                                      | 31            |                | 225                                        | 10            |                |
| 1p/19q status   |                                          |               | <0.001         |                                            |               | <0.001         |
| Codeletion      | 7                                        | 48            |                | 10                                         | 158           |                |
| Non-codeletion  | 140                                      | 110           |                | 311                                        | 181           |                |
