# Supplementary material for: Identification of an IL-4-Related Gene Risk Signature for Malignancy, Prognosis and Immune Phenotype Prediction in Glioma
Source: MDPI journal article supplement (doi:10.3390/brainsci12020181), 2022-01-29
Supplement: s1 [file s1]

Table S1: Clinicopathological features of two clusters classified by consensus clustering based on cellular response to IL-4-related gene set in CGGA dataset.

| <b>Features</b>        | <b>Cluster 1 (n=124)</b> | <b>Cluster 2 (n=201)</b> | <b><i>P</i> value</b> |
|------------------------|--------------------------|--------------------------|-----------------------|
| <b>Age</b>             |                          |                          | < 0.0001              |
| Median                 | 38                       | 46                       |                       |
| <b>Gender</b>          |                          |                          | 0.3513                |
| Female                 | 51                       | 71                       |                       |
| Male                   | 73                       | 130                      |                       |
| <b>TCGA subtype</b>    |                          |                          | < 0.0001              |
| Classical              | 10                       | 64                       |                       |
| Mesenchymal            | 7                        | 61                       |                       |
| Neural                 | 33                       | 48                       |                       |
| Proneural              | 74                       | 28                       |                       |
| <b>WHO Tumor grade</b> |                          |                          | < 0.0001              |
| II                     | 67                       | 42                       |                       |
| III                    | 30                       | 42                       |                       |
| IV                     | 27                       | 117                      |                       |
| <b>IDH status</b>      |                          |                          | < 0.0001              |
| Mutation               | 108                      | 59                       |                       |
| Wildtype               | 16                       | 142                      |                       |
| <b>1p/19q status</b>   |                          |                          | < 0.0001              |
| Codeletion             | 35                       | 20                       |                       |
| Non-codeletion         | 84                       | 166                      |                       |
| NA                     | 5                        | 15                       |                       |
