# Supplementary figures and images for: Identification of an IL-4-Related Gene Risk Signature for Malignancy, Prognosis and Immune Phenotype Prediction in Glioma
Source: MDPI journal article supplement (doi:10.3390/brainsci12020181), 2022-01-29

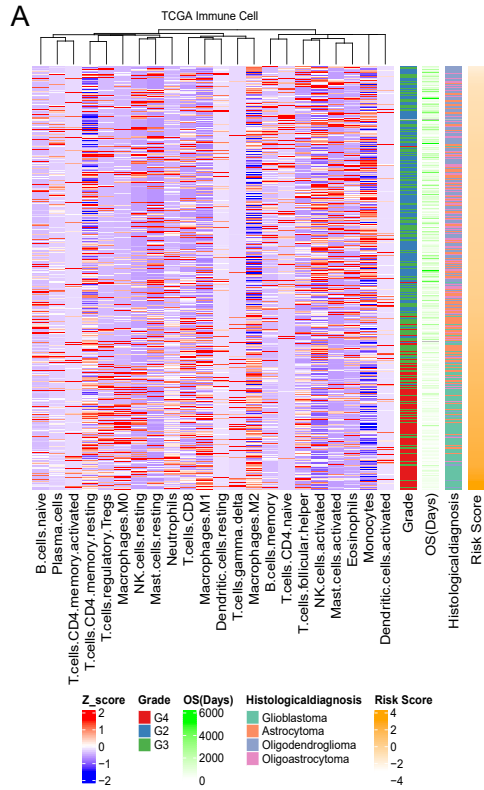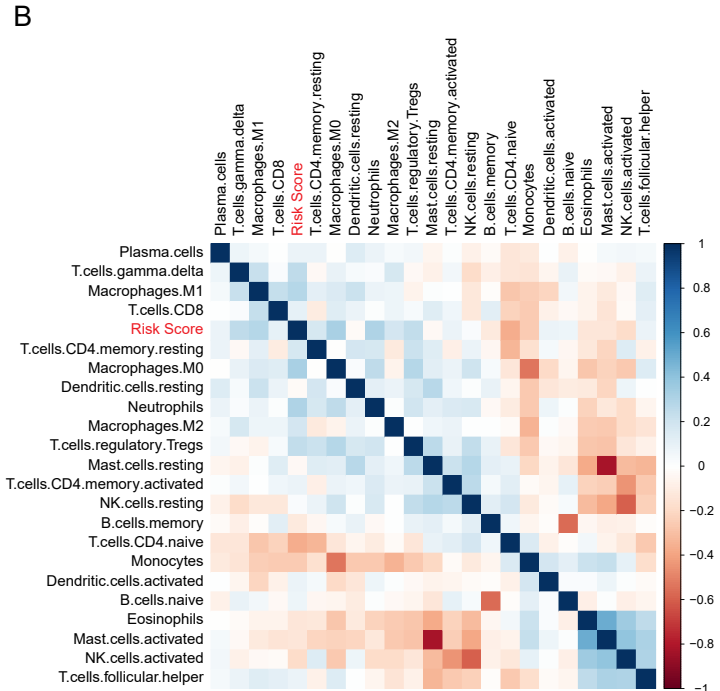

Supplement: s1 [file s1]

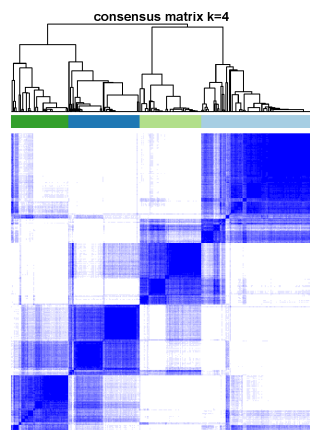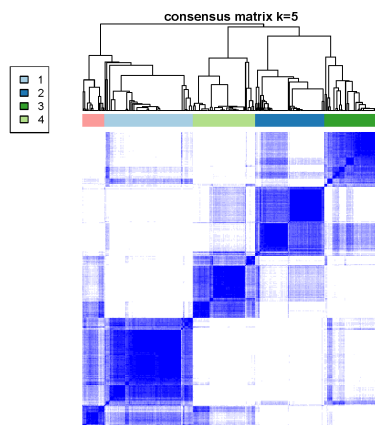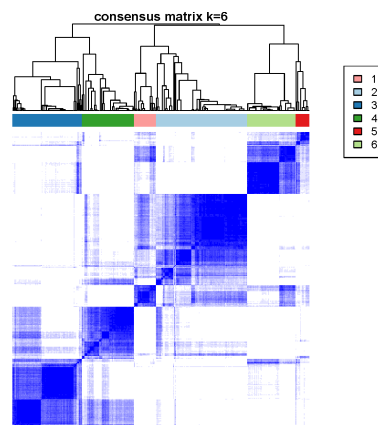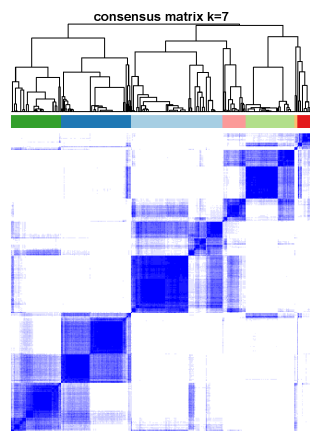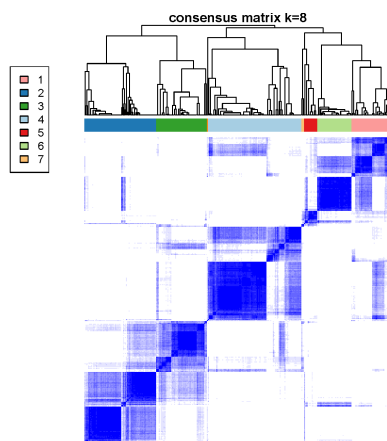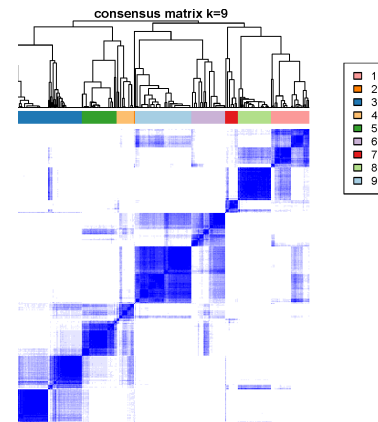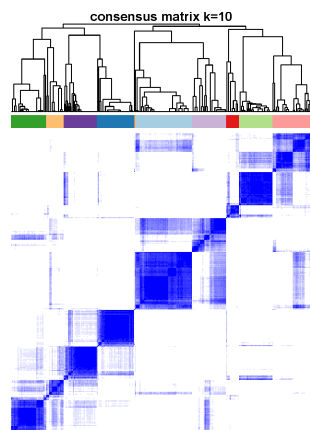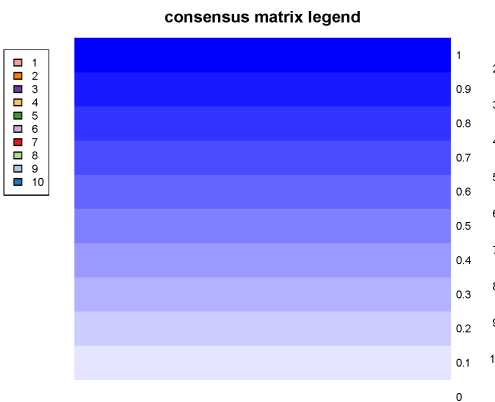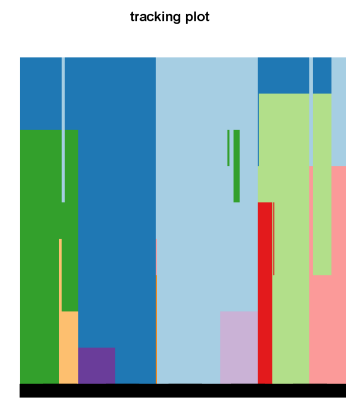

samples

Supplement: s1 [file s1]
